# Supplementary material
Source: PubMed Central journal article supplement (PMC10664749)
Supplement: ehp11532.smcontents.508.pdf [file ehp11532.smcontents.508.pdf]

**Note to readers with disabilities:** *EHP* strives to ensure that all journal content is accessible to all readers. However, some figures and Supplemental Material published in *EHP* articles may not conform to [508 standards](#) due to the complexity of the information being presented. If you need assistance accessing journal content, please contact [ehp508@niehs.nih.gov](mailto:ehp508@niehs.nih.gov). Our staff will work with you to assess and meet your accessibility needs within 3 working days.

### **Supplemental Material**

#### **Evidence Synthesis of Observational Studies in Environmental Health: Lessons Learned from a Systematic Review on Traffic-Related Air Pollution**

Hanna Boogaard, Richard W. Atkinson, Jeffrey R. Brook, Howard H. Chang, Gerard Hoek, Barbara Hoffmann, Sharon K. Sagiv, Evangelia Samoli, Audrey Smargiassi, Adam A. Szpiro, Danielle Vienneau, Jennifer Weuve, Frederick W. Lurmann, and Francesco Forastiere

#### **Table of Contents**

##### **List of main modifications to the OHAT approach for the traffic review.**

**Table S1.** Comparison of main similarities and differences between the modified OHAT assessment and the “narrative” assessment.

**Table S2.** Summary of number of up- and downgrading factors used in the modified OHAT confidence assessment between TRAP and selected health outcomes.

**Table S3.** Summary of “narrative” assessment between TRAP and selected health outcomes.

**Figure S1.** Meta-analysis of associations between traffic-related air pollutants and asthma onset in children.

**Table S4.** Confidence rating for TRAP and asthma onset in children using the modified OHAT assessment.

**“Narrative” assesment for TRAP and asthma onset in children.**

#### **References**
